# Supplementary material for: Fluoride and Calcium Release from Alkasite and Glass Ionomer Restorative Dental Materials: In Vitro Study
Source: MDPI journal article supplement (doi:10.3390/jfb14020109), 2023-02-15

## SUPPLEMENTARY MATERIALS

# Fluoride and Calcium Release from Alkasite and Glass Ionomer Restorative Dental Materials: In-Vitro Study

Alessandro di Lauro <sup>1</sup>, Fabiana Di Duca <sup>2,\*</sup>, Paolo Montuori <sup>2</sup>, João Paulo Mendes Tribst <sup>3</sup>, Amanda Maria de Oliveira Dal Piva <sup>4</sup>, Alexandre Luiz Souto Borges <sup>5</sup> and Pietro Ausiello <sup>1</sup>

**Figure 1S.** pH changes after three observation times (24 h, 7 and 28 days) and four temperatures (0, 18, 37 and 44 °C) in 3 different buffered solution: a) pH = 4.8; b) pH = 6.8 and c) pH = 8.8.

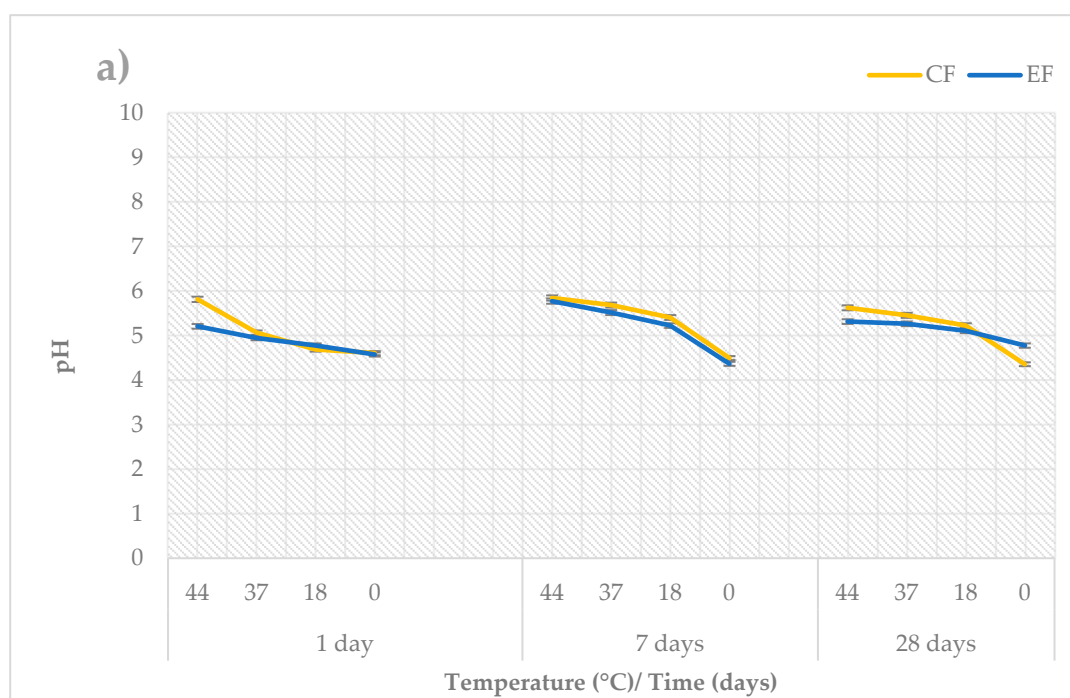

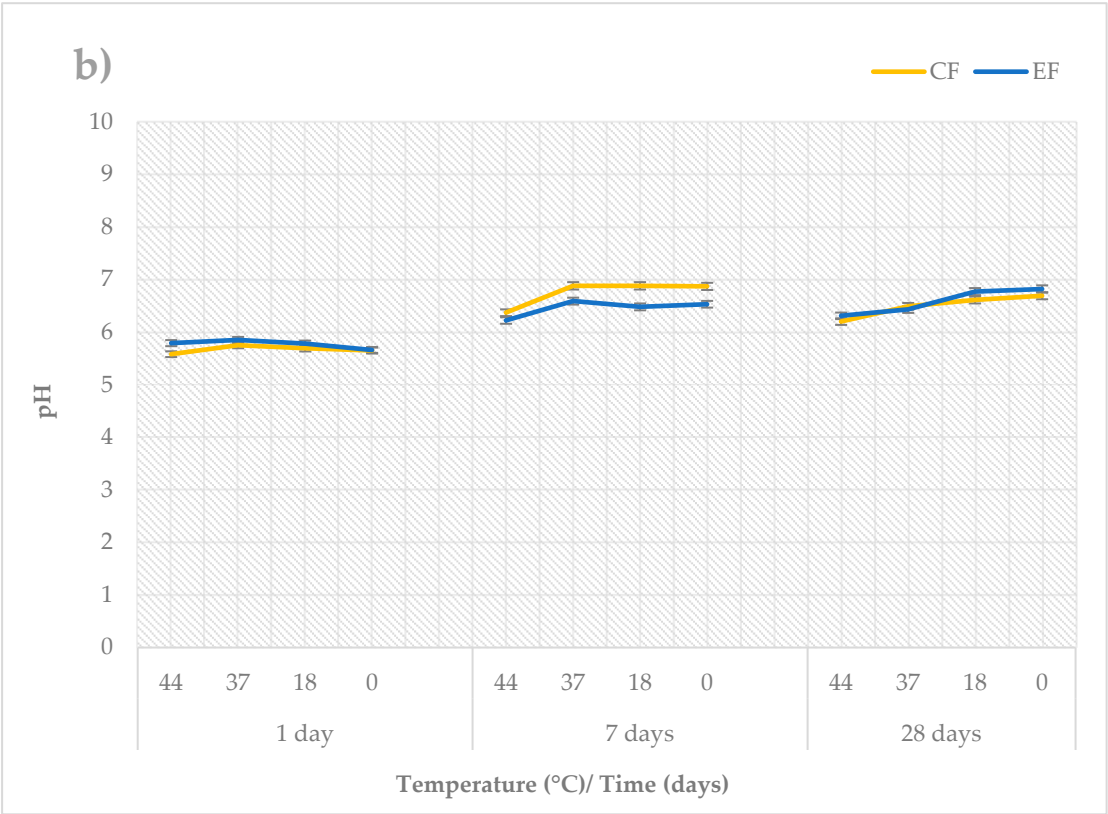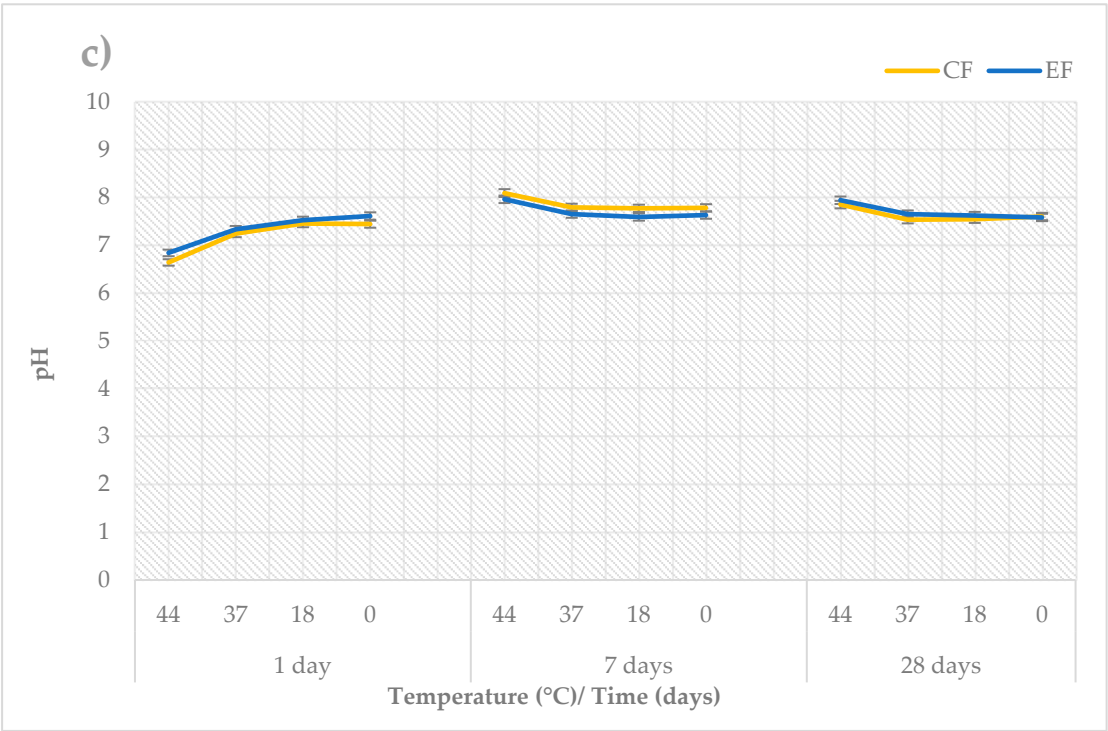

**Figure 2S.** Average concentration of fluoride ion released from Materials 1 and 2 for three observation times (24 h, 7 and 28 days) and four temperatures (0, 18, 37 and 44 °C) in **a)** acid medium (pH = 4.8); **b)** neutral environment (pH = 6.8); **c)** basic environment (pH = 8.8).

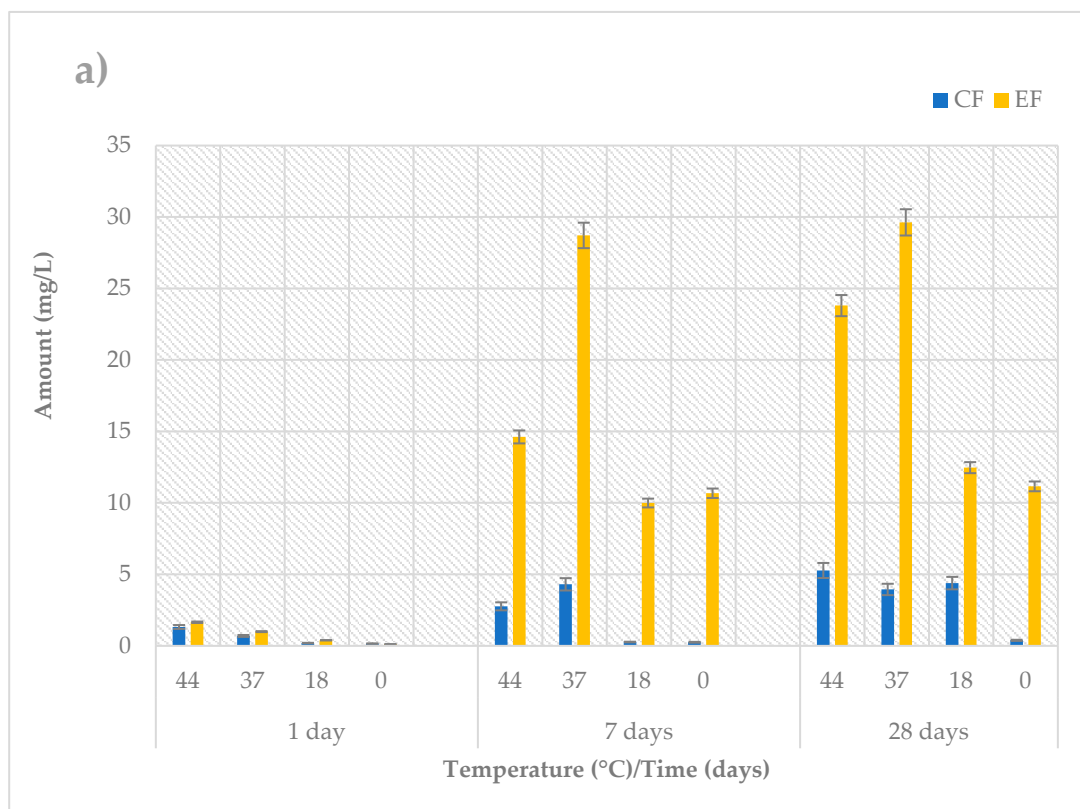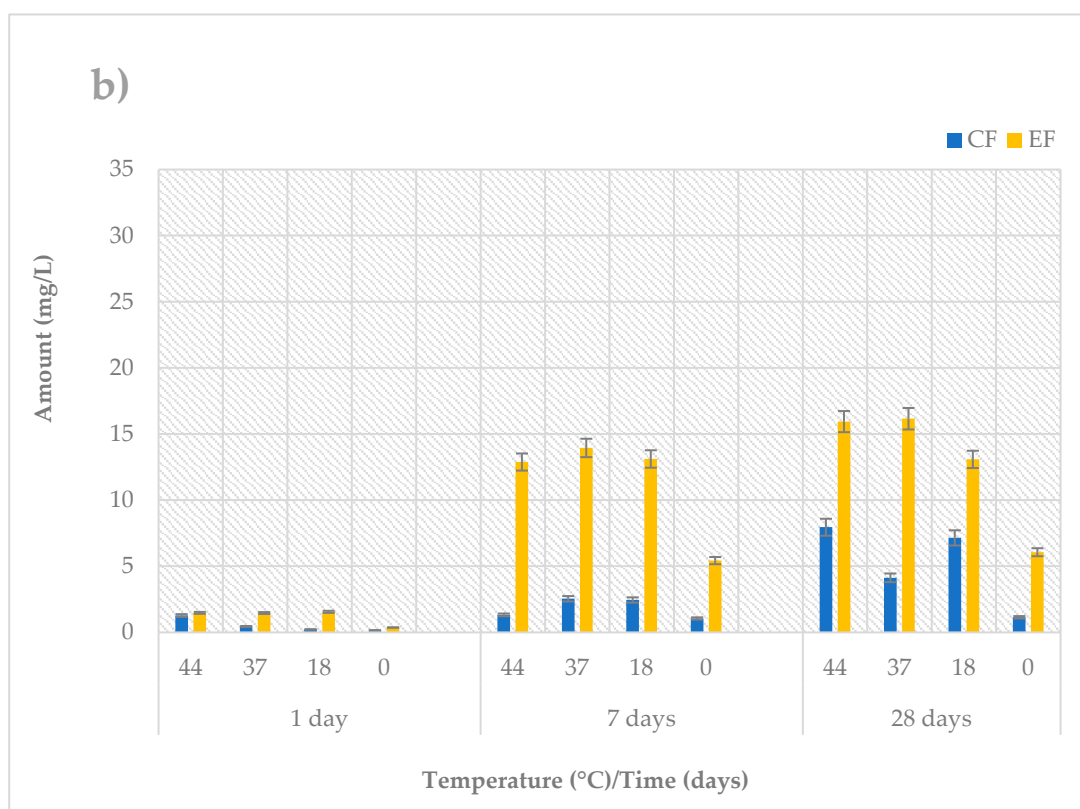

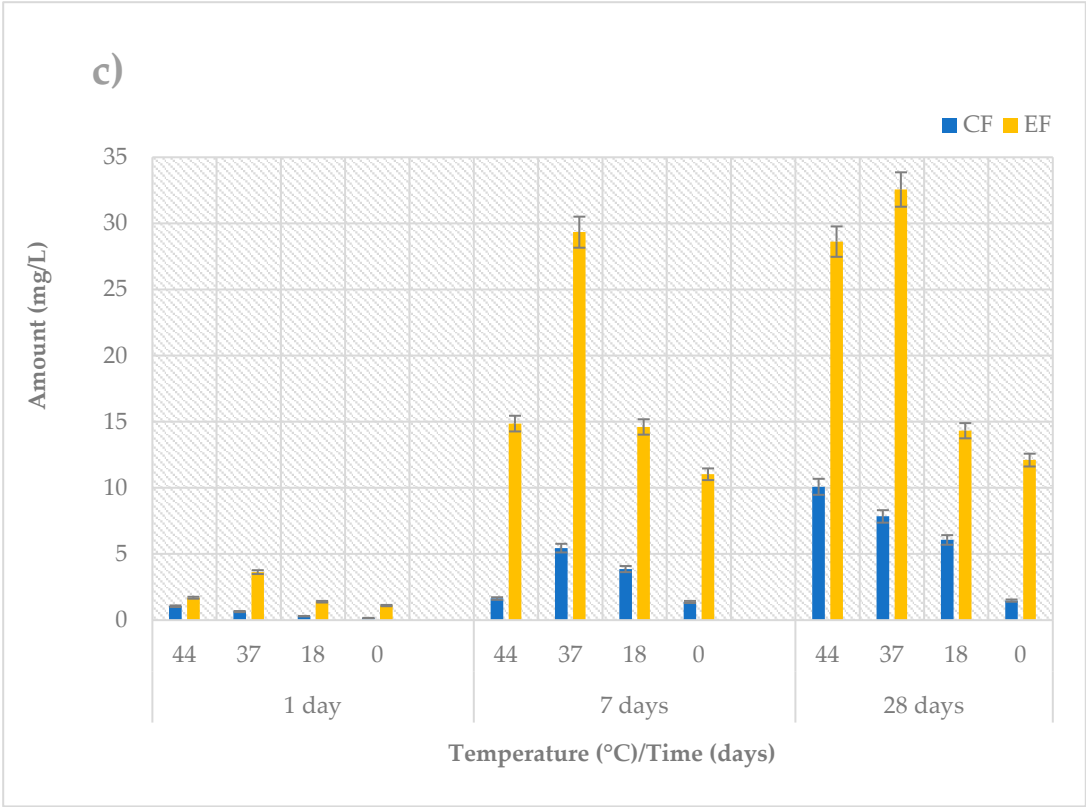

**Figure 3S.** Average concentration of calcium ion released from the Material 1 and 2 for three observation times (24 h, 7 and 28 days) and four temperatures (0, 18, 37 and 44 °C) in **a)** acid medium (pH = 4.8); **b)** neutral environment (pH = 6.8); **c)** basic environment (pH = 8.8).

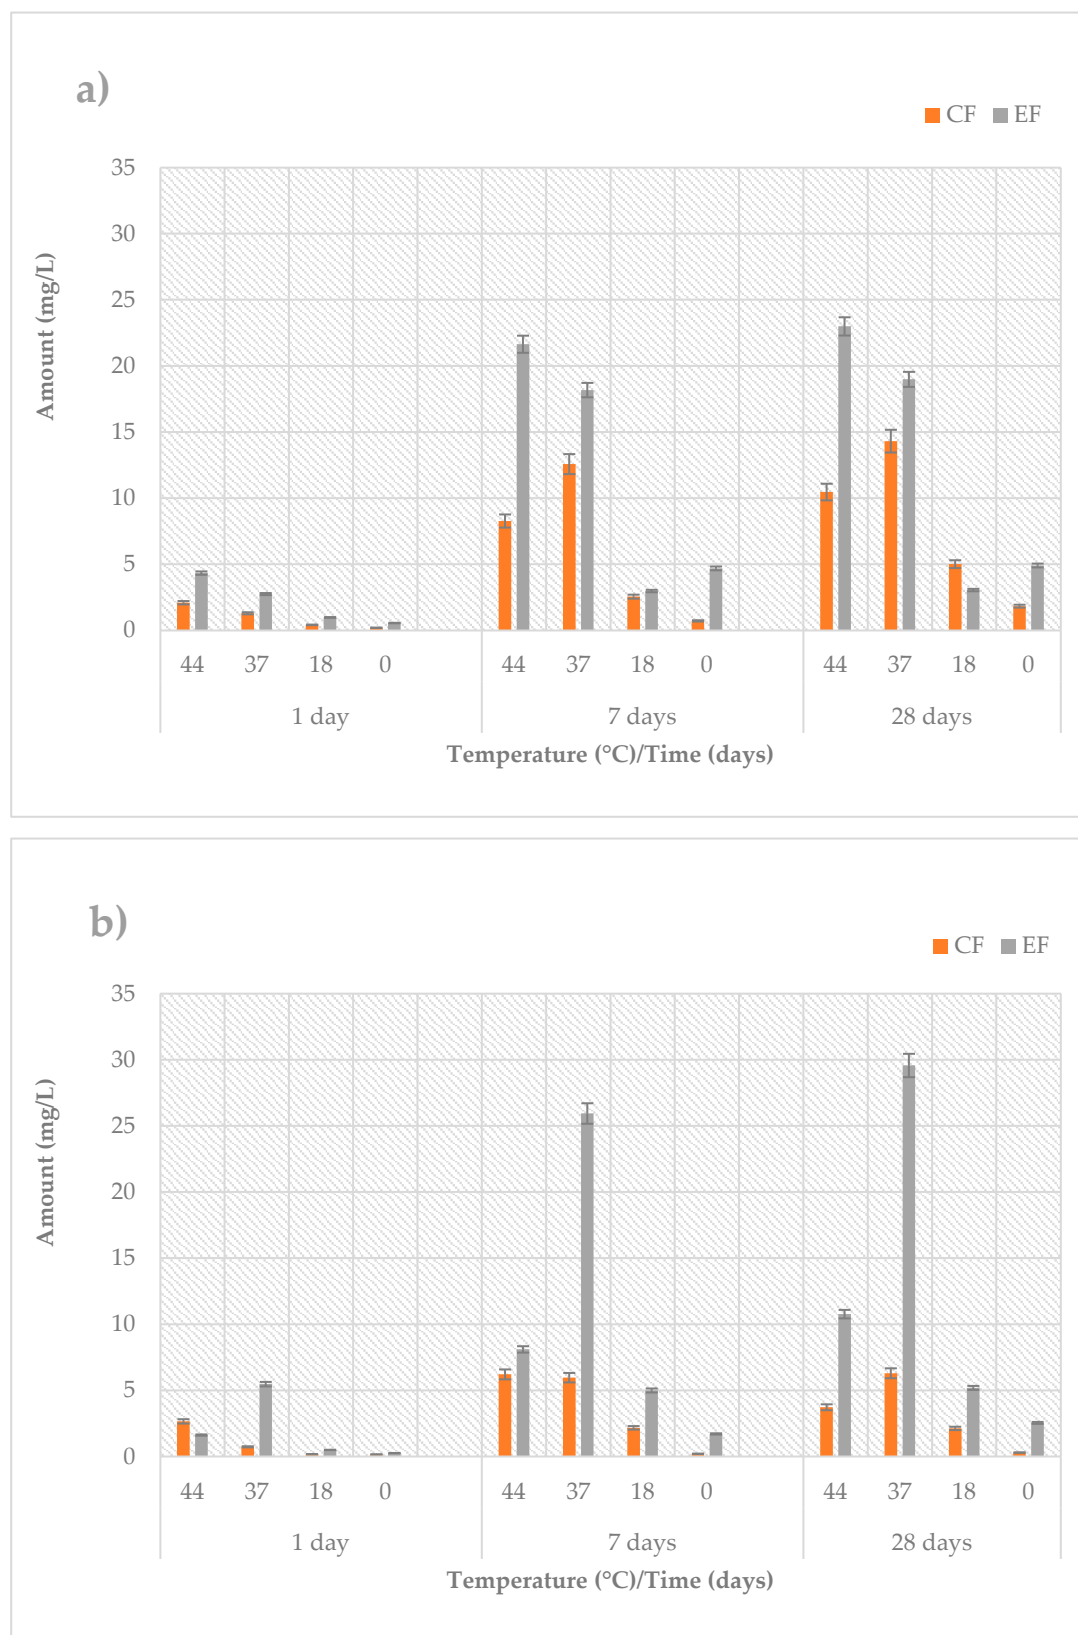

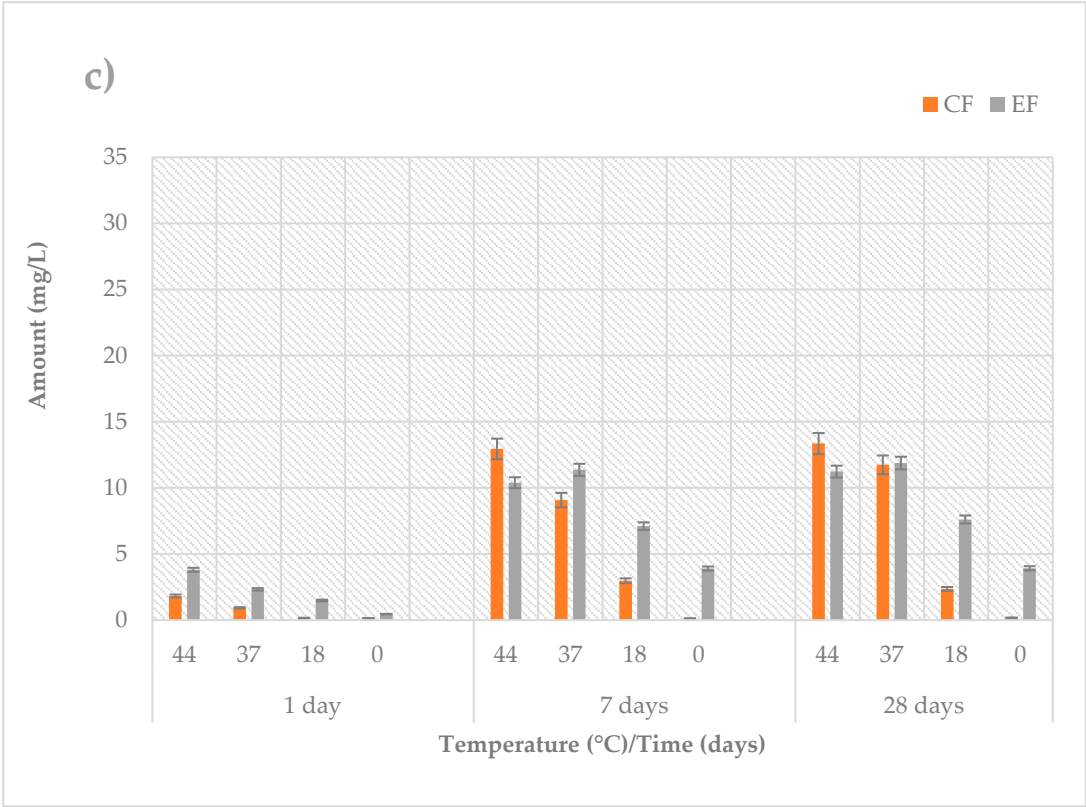

Supplement: s1 [file s1]
